# Supplementary material
Source: PubMed Central journal article supplement (PMC3950937)
Supplement: NIHMS192123-supplement-01.pdf [file NIHMS192123-supplement-01.pdf]

Supplementary Table 1: Common genetic variants in pathways related to cytokine signaling and/or EBV control and the putative polymorphic effect on risk of AIDS-lymphoma.

| Gene        | Protein function related to AIDS-related NHL                                                                                                                                                                                                                                                                                                                                                                              | dbSNP                                        | SNP <sup>ref</sup> (alias)                                                                          | Reported SNP allelic difference <sup>ref</sup>                                                                                                                                                                                                                                                                                                                                                                                                                                                                                                                                                                                                                                                                                                                                                                           |
|-------------|---------------------------------------------------------------------------------------------------------------------------------------------------------------------------------------------------------------------------------------------------------------------------------------------------------------------------------------------------------------------------------------------------------------------------|----------------------------------------------|-----------------------------------------------------------------------------------------------------|--------------------------------------------------------------------------------------------------------------------------------------------------------------------------------------------------------------------------------------------------------------------------------------------------------------------------------------------------------------------------------------------------------------------------------------------------------------------------------------------------------------------------------------------------------------------------------------------------------------------------------------------------------------------------------------------------------------------------------------------------------------------------------------------------------------------------|
| <i>IL10</i> | <p>Immunomodulatory cytokine produced by, among others, B cells(1), with pleiotropic cellular actions including</p> <ul style="list-style-type: none"> <li>- enhancing B cell viability, particularly with IL4 co-stimulation(2) and lymphoma growth at the auto/para-crine level(3)</li> <li>- inducing differentiation of CD40-stimulated B cells(4) and apoptosis of <i>S. aureus</i>-activated B cells(5).</li> </ul> | <p>rs1800896<br/>rs1800871<br/>rs1800872</p> | <p>-1082A&gt;G(6)<br/>- 819C&gt;T(6)<br/>-592C&gt;A(6)</p> <p><u>Haplotypes</u><br/>GCC;ACC;ATA</p> | <p><u>Genotypes</u><br/>IL10 592 CC is associated with higher IL10 serum level in HIV-seropositive men and increased risk of AIDS-related NHL as compared to all other genotypes(7).</p> <p>IL -1082 GG is associated with higher plasma IL10 in healthy individuals as compared to all other genotypes(8).</p> <p><u>Haplotypes</u><br/><i>Cytokine transcription, production or blood levels by haplotypes (cell type or blood levels, stimulus or population):</i></p> <p>a) GCC haplotype &gt; ACC and ATA (PBMC, <i>E. coli</i> LPS) (6)<br/>(GCC&gt;ATA; U937 monocyte cell line, luciferase assay)(9)<br/>(GCC&gt;ATA; whole blood, <i>S. marcescens</i> LPS)(9)<br/>(plasma IL10, Sjorgen Syndrome, a B-cell hyperactivity syndrome)(10)</p> <p>b) ATA &gt; GCC and/or ACC :<br/>(plasma IL10, neonates)(11)</p> |

|               |                                                                                                                                                                                                                                                                                                                                                                              |           |                                        |                                                                                                                                                                                                                               |
|---------------|------------------------------------------------------------------------------------------------------------------------------------------------------------------------------------------------------------------------------------------------------------------------------------------------------------------------------------------------------------------------------|-----------|----------------------------------------|-------------------------------------------------------------------------------------------------------------------------------------------------------------------------------------------------------------------------------|
|               |                                                                                                                                                                                                                                                                                                                                                                              |           |                                        | (IL10 mRNA in PBMCs, <i>S.pneumonia</i> )(12)                                                                                                                                                                                 |
| <i>IL10RA</i> | <ul style="list-style-type: none"> <li>- mediates the actions of IL10(13)</li> <li>- inhibits the synthesis of proinflammatory cytokines</li> </ul>                                                                                                                                                                                                                          | rs9610    | A3524G                                 | (Ala/Gln) in 3'UTR                                                                                                                                                                                                            |
| <i>CXCL12</i> | <ul style="list-style-type: none"> <li>- regulate normal B-lymphocyte maturation and proliferation</li> <li>- expressed by malignant B cells derived from primary central nervous system lymphomas (CNS)(14).</li> </ul>                                                                                                                                                     | rs1801157 | 3'UTR-801G-A (SDF1-3'A)                | <p>No detectable effect on mRNA transcript and protein(15)</p> <p>No allelic variation in gene expression in EBV-transformed lymphoblastoid cell lines(16)</p> <p><i>SDF1-3'A</i> is associated with AIDS-related NHL(17)</p> |
| <i>IL13</i>   | <ul style="list-style-type: none"> <li>- induces immunoglobulin E (IgE), the stimulus for allergic symptoms, in B cells (18) possibly through its receptor, IL4 receptor-<math>\alpha</math> (IL4R).</li> <li>- influences growth of non-Hodgkin's B-lymphoma cells in vitro(19).</li> <li>- anti-inflammatory</li> <li>- suppresses IL1, IL6, and IL8 production</li> </ul> | rs1800925 | -1055C>T(20, 21)<br>(-1069)<br>(-1112) | 1055T: increased IL13 production & increased recruitment of binding protein to the genomic region and allergic asthma(20)                                                                                                     |
|               |                                                                                                                                                                                                                                                                                                                                                                              |           |                                        |                                                                                                                                                                                                                               |

|             |                                                                                                                                                                                                                                                                                                                                    |                            |                                                                                                               |                                                                                                                                                        |
|-------------|------------------------------------------------------------------------------------------------------------------------------------------------------------------------------------------------------------------------------------------------------------------------------------------------------------------------------------|----------------------------|---------------------------------------------------------------------------------------------------------------|--------------------------------------------------------------------------------------------------------------------------------------------------------|
| <i>IL4</i>  | <ul style="list-style-type: none"> <li>- induce IgE, the stimulus for allergic symptoms, in B cells (18) possibly through its receptor, IL4R.</li> <li>- increases survival growth of non-Hodgkin's B-lymphoma cells in vitro(22).</li> <li>- regulates antibody production</li> <li>- attenuates inflammatory response</li> </ul> | rs2243250<br><br>rs2070874 | <p>-584C&gt;T (23)<br/>(590 from ATG codon)(24)<br/>(-524 from exon1)(25)</p> <p>Ex1 C-168T<br/>(-33)(24)</p> | <p>Allele 584T: Higher <i>IL4</i> transcriptional activity(26)</p> <p>In complete LD with rs2243250</p>                                                |
| <i>IL4R</i> | <ul style="list-style-type: none"> <li>- receptor for IL4 and IL13</li> <li>- regulates IgE production, chemokine and mucus production, allergic inflammation.</li> </ul>                                                                                                                                                          | rs1801275                  | (Q576R)(27)<br>Q551R(28)                                                                                      | nonsynonymous (Gln/Arg) coding exon is associated with atopy and allergy(27)<br>total IgE concentrations(29)                                           |
| <i>CCL5</i> | <ul style="list-style-type: none"> <li>- upregulation relate to allergic inflammation and atopic diseases (30) and other cancers, i.e., breast and ovarian cancers(31).</li> <li>- cd4 Tcell depletion in HIV</li> </ul>                                                                                                           | rs2280788<br><br>rs2107538 | -28C>G(32)<br><br>-403G>A(32)                                                                                 | <p>Allele 28G: higher <i>CCL5</i> transcription(32)</p> <p>Allele 403A: higher <i>CCL5</i> transcription and associated with atopic dermatitis(33)</p> |
| <i>BCL6</i> | <ul style="list-style-type: none"> <li>- a proto-oncogene identified from chromosomal breakpoints in the diffuse</li> </ul>                                                                                                                                                                                                        | rs1056932                  | N387N<br>(Ex6-195C>T)(40)                                                                                     | As compared to the TT homozygotes, carriers of the CC genotype were associated with increased NHL risk(40).                                            |

|  |                                                                                                                                                                                                                                                                                                                                             |           |             |  |
|--|---------------------------------------------------------------------------------------------------------------------------------------------------------------------------------------------------------------------------------------------------------------------------------------------------------------------------------------------|-----------|-------------|--|
|  | <p>large B-cell subtypes of NHL in immunocompetent persons(34-36)<br/>- frequently translocated in lymphomas, regulates germinal center B cell differentiation and inflammation including T-helper type 2 cytokines in mast cells(37).<br/>- BCL6 somatic mutations are associated with diffuse large-cell subtype of AIDS-NHL(38, 39).</p> | rs3774306 | IVS7-643G>A |  |
|--|---------------------------------------------------------------------------------------------------------------------------------------------------------------------------------------------------------------------------------------------------------------------------------------------------------------------------------------------|-----------|-------------|--|

rs, reference SNP ID
